# Supplementary material for: Novel distyryl BODIPY–fullerene dyads: preparation, characterization and photosensitized singlet oxygen generation efficiency
Source: Royal Society of Chemistry journal article supplement (doi:10.1039/c7nj02010d), 2017-01-01
Supplement: c7nj02010d1.pdf [file c7nj02010d1.pdf]

# **Novel Distyryl BODIPY-Fullerene Dyads: Preparation, Characterization and photosensitized singlet oxygen generation efficiency**

Hasan Ünlü<sup>a</sup>, Elif Okutan<sup>a\*</sup>

<sup>a</sup> Department of Chemistry, Faculty of Science, Gebze Technical University, Gebze, Kocaeli, Turkey

## **Contents**

**Fig. S1.** MALDI- MS spectra of compound 3

**Fig. S2.** <sup>1</sup>H- NMR spectra of Compound 3 in CDCl<sub>3</sub>

**Fig. S3.** <sup>13</sup>C- NMR spectra of Compound 3 in CDCl<sub>3</sub>

**Fig. S4.** MALDI- MS spectra of compound 4

**Fig. S5.** <sup>1</sup>H- NMR spectra of Compound 4 in CDCl<sub>3</sub>

**Fig. S6.** <sup>13</sup>C- NMR spectra of Compound 4 in CDCl<sub>3</sub>

**Fig. S7.** MALDI- MS spectra of compound 5

**Fig. S8.** <sup>1</sup>H- NMR spectra of Compound 5 in CDCl<sub>3</sub>

**Fig. S9.** <sup>13</sup>C- NMR spectra of Compound 5 in CDCl<sub>3</sub>

**Fig. S10.** Absorption spectra plots of compounds 4- 7 in DCM at different concentrations

**Fig. S11.** The photostabilities of compounds 4-7 (5 μM) in dichloromethane

**Fig. S12.** Fluorescence decay profiles of compounds 4 and 5 in dichloromethane

**Fig. S13.** Decrease in absorbance spectrum of DPBF in the presence of MB

**Fig. S14.** Decrease in absorbance spectrum of DPBF in the presence of compound 4 (6.7 μM)

**Fig. S15.** Decrease in absorbance spectrum of DPBF in the presence of compound 5 (6.7 μM).

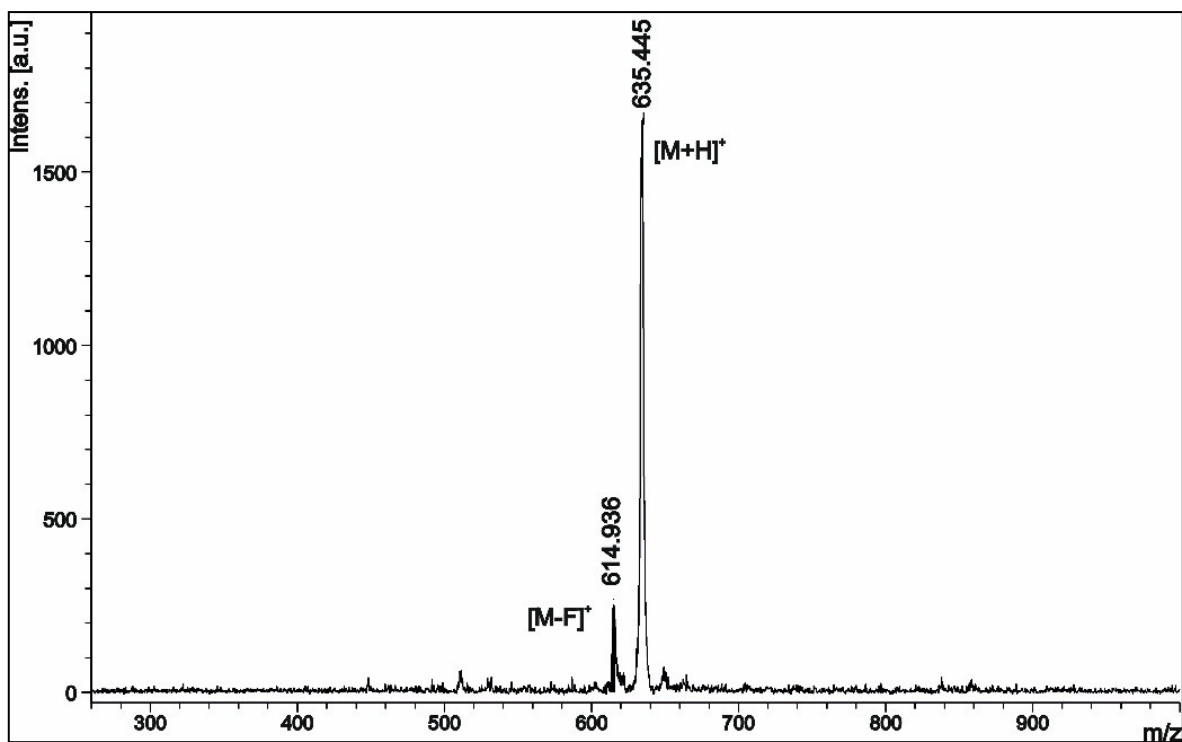

Fig. S1. MALDI- MS spectra of compound 3

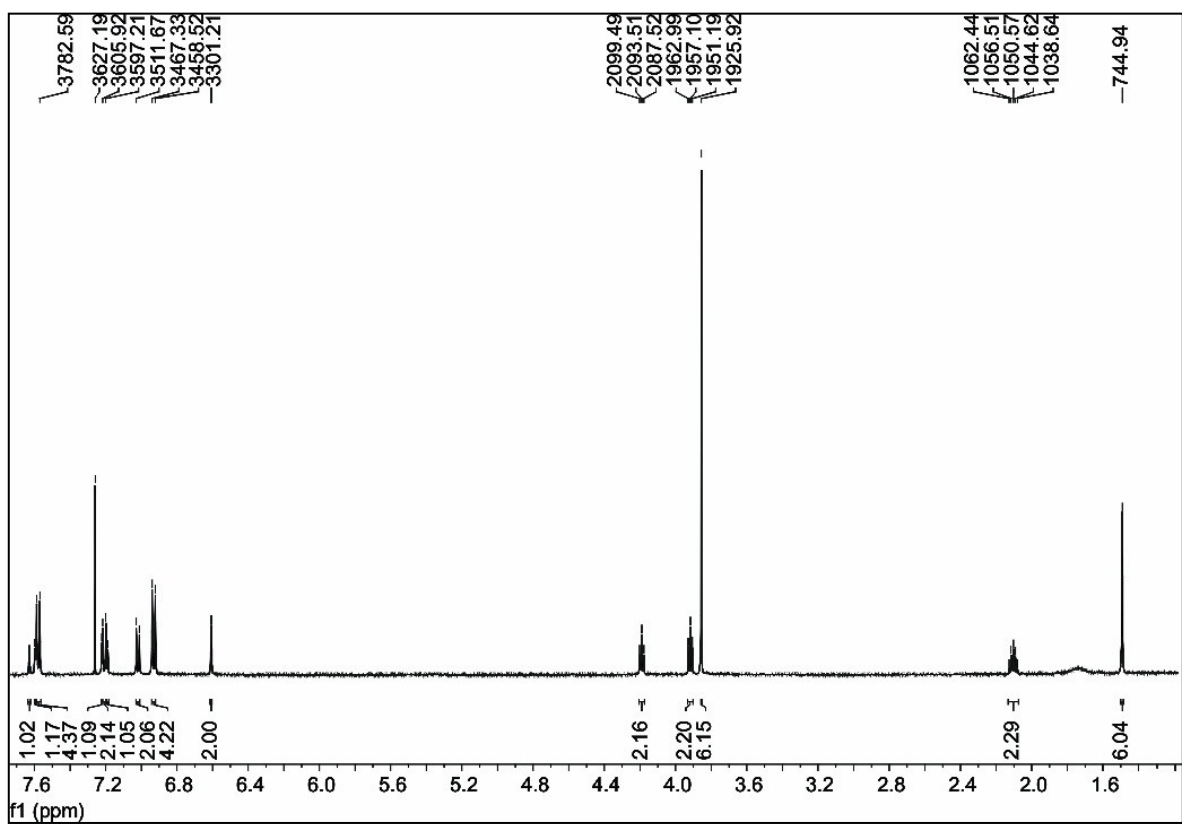

**Fig. S2.**  $^1\text{H}$ - NMR spectra of Compound 3 in  $\text{CDCl}_3$

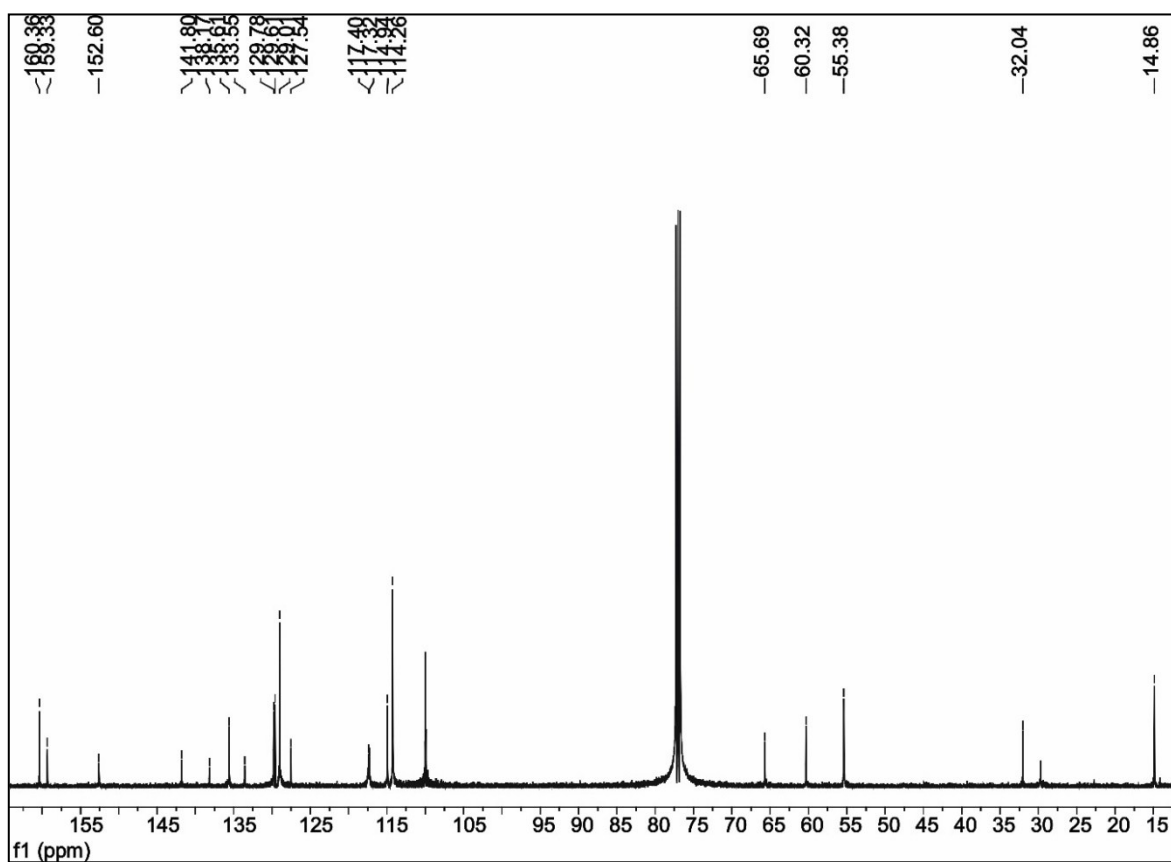

**Fig. S3.**  $^{13}\text{C}$ - NMR spectra of Compound 3 in  $\text{CDCl}_3$

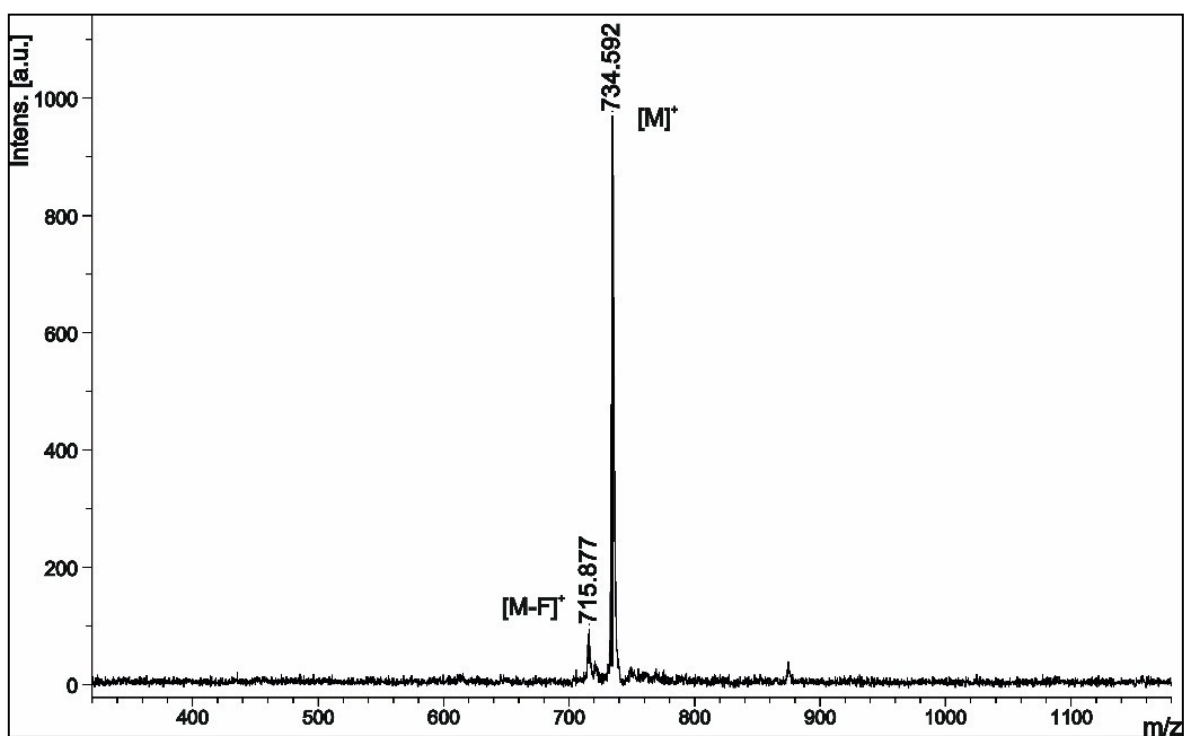

**Fig. S4.** MALDI- MS spectra of compound 4

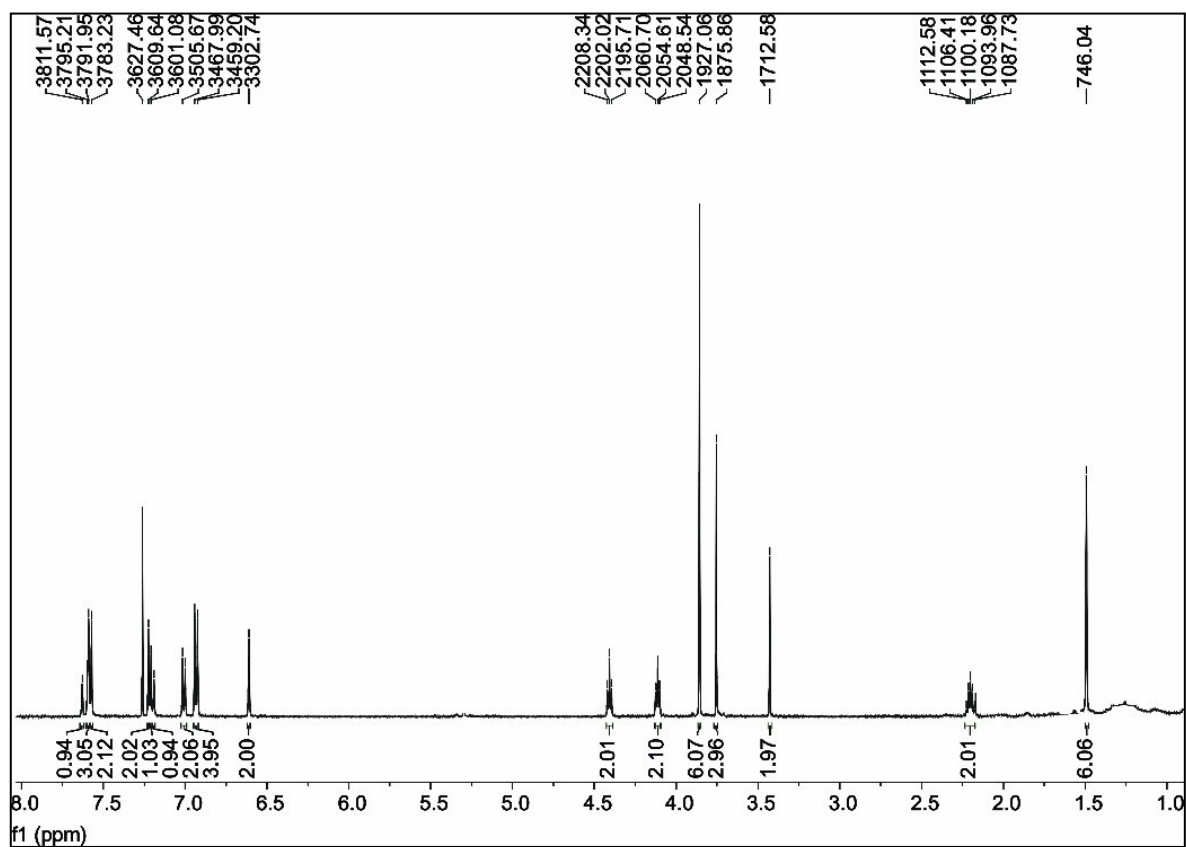

**Fig. S5.**  $^1\text{H}$ - NMR spectra of Compound 4 in  $\text{CDCl}_3$

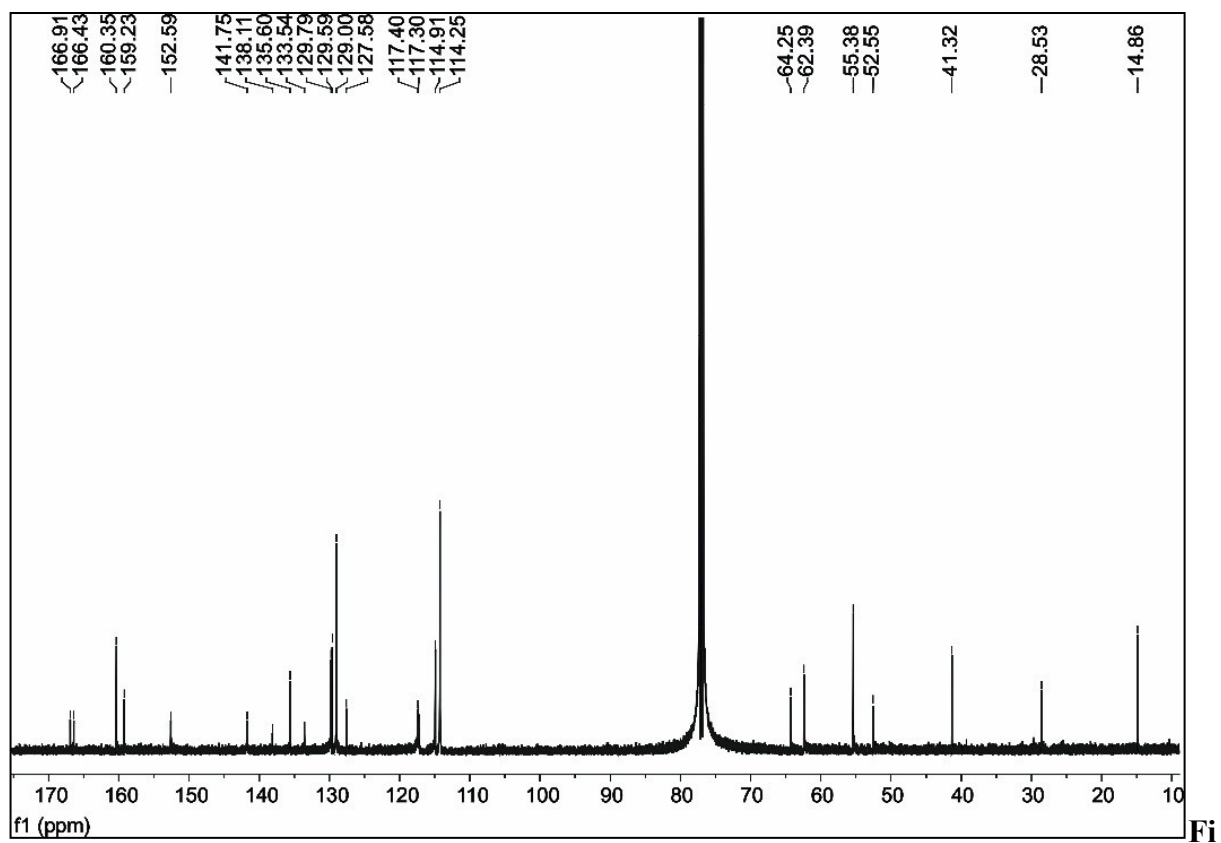

g. S6.  $^{13}\text{C}$ - NMR spectra of Compound 4 in  $\text{CDCl}_3$

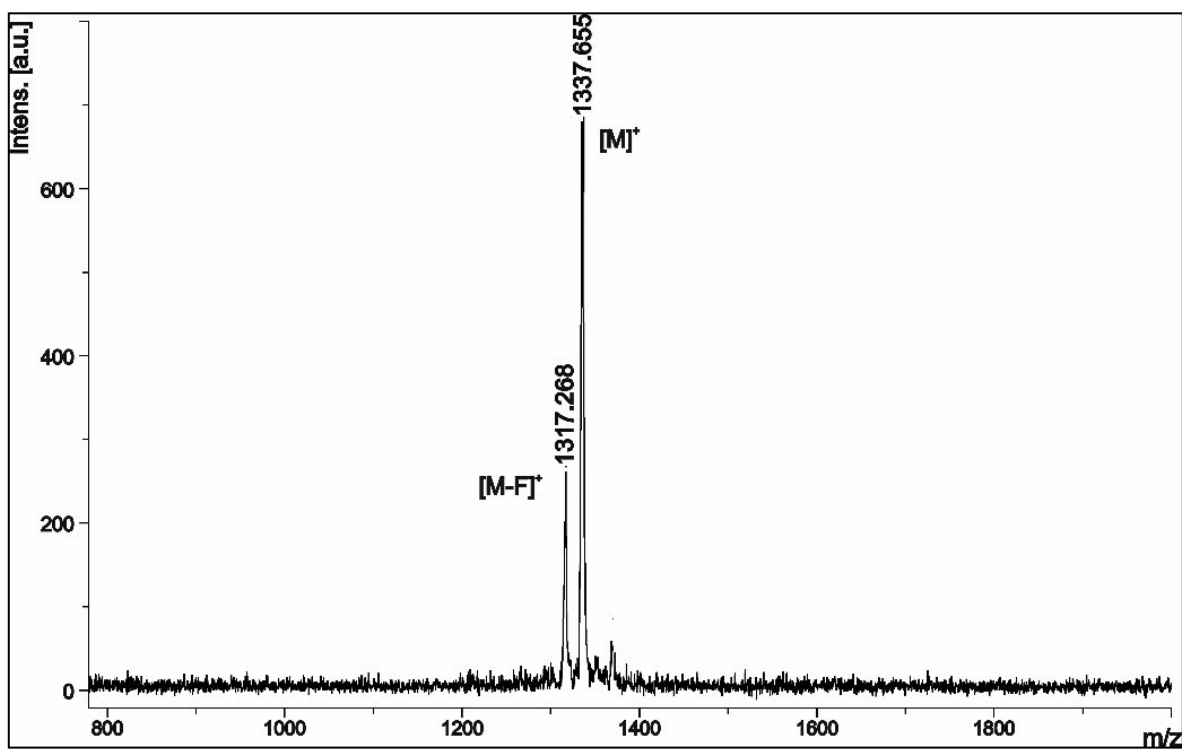

Fig. S7. MALDI- MS spectra of compound 5

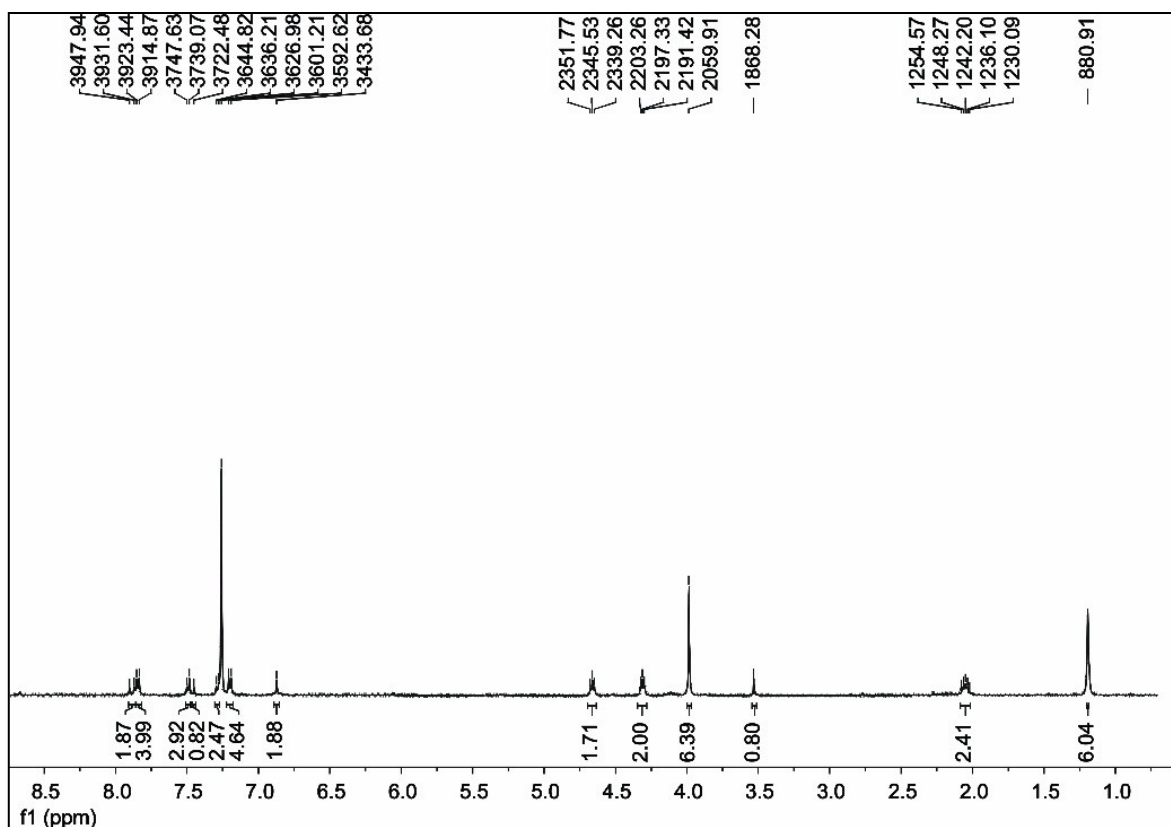

**Fig. S8.** <sup>1</sup>H- NMR spectra of Compound 5 in CDCl<sub>3</sub>

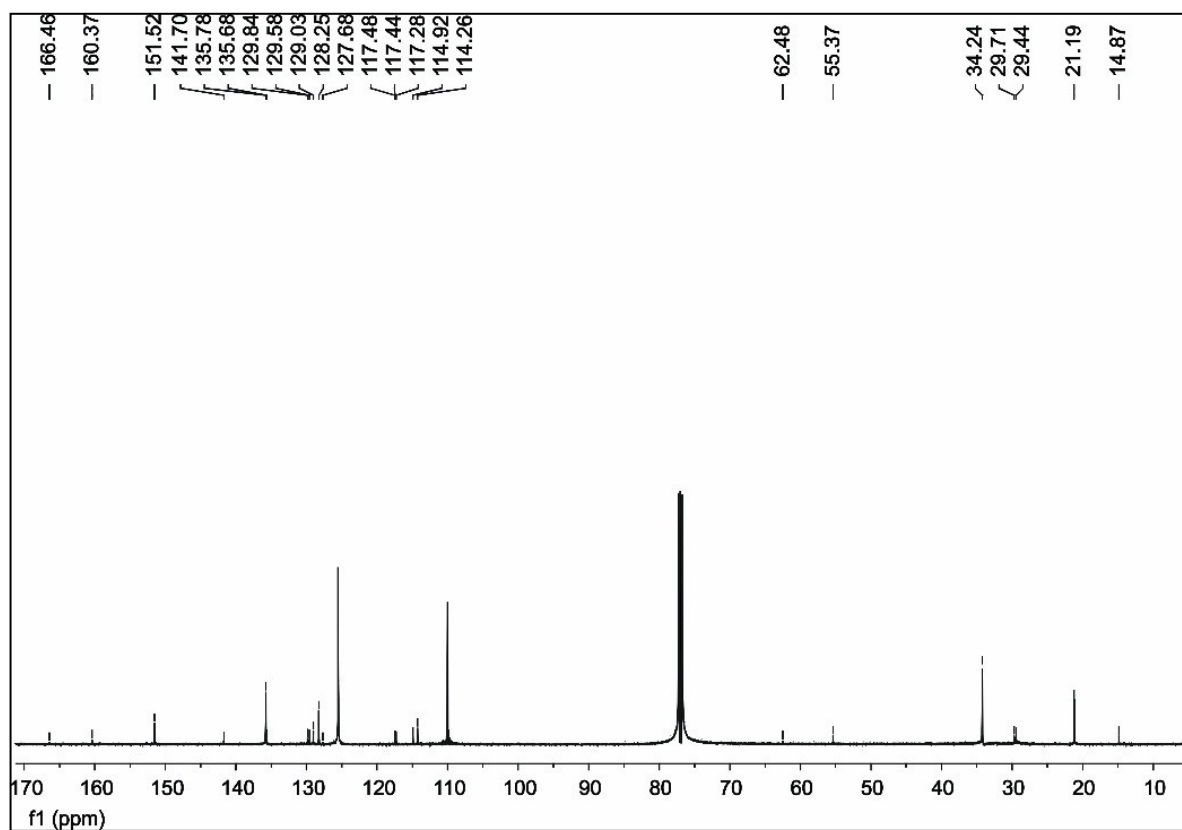

**g. S9.** <sup>13</sup>C- NMR spectra of Compound 5 in CDCl<sub>3</sub>

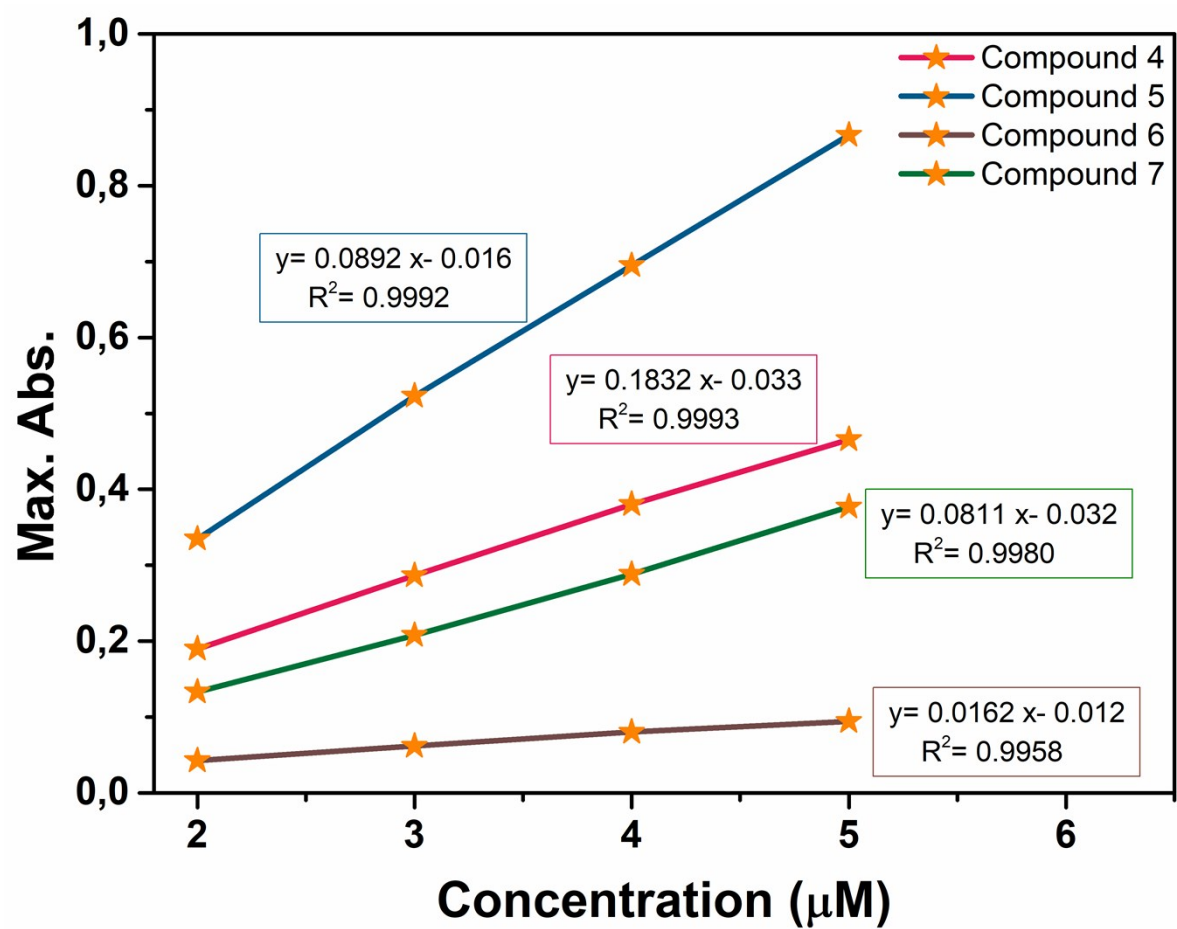

**Fig. S10.** Absorption spectra plots of compounds 4- 7 in DCM at different concentrations

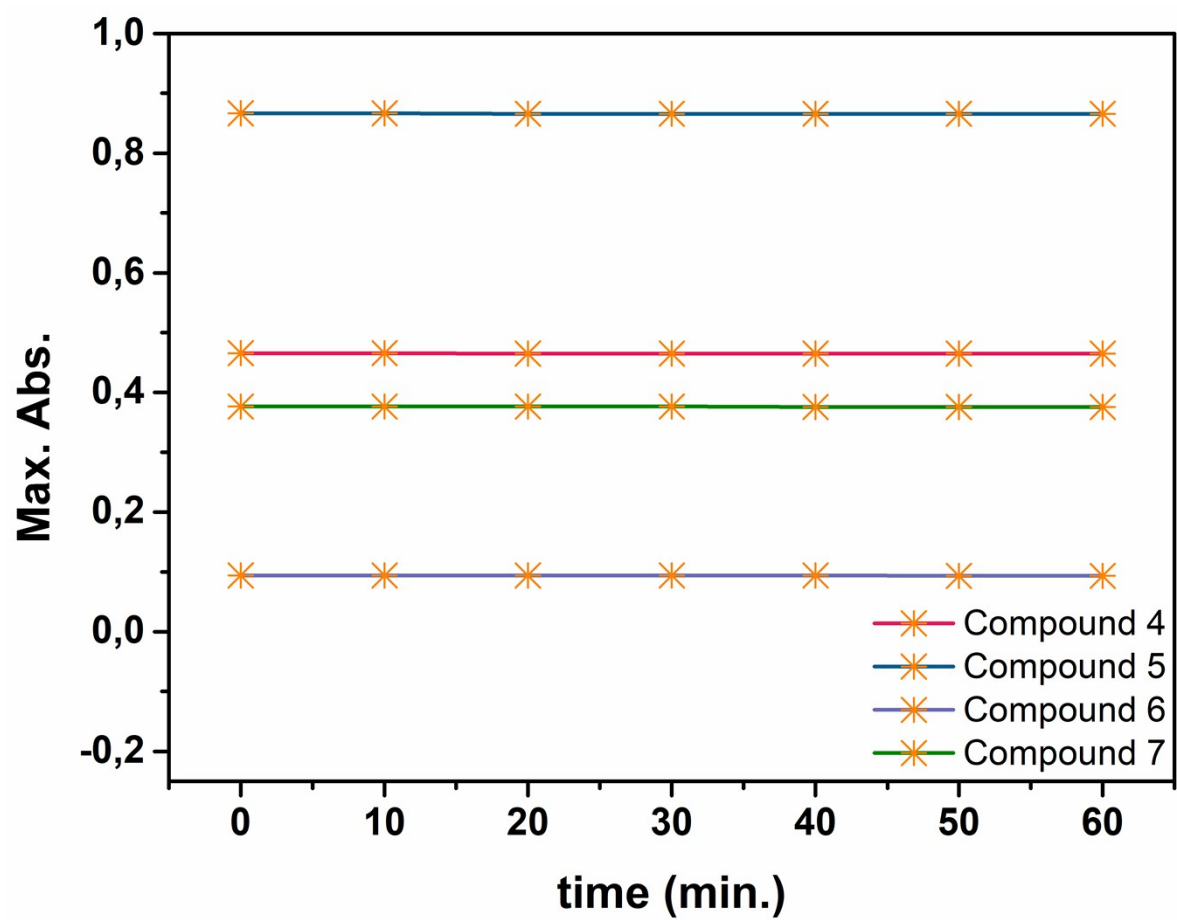

Fig. S11. The photostabilities of compounds 4-7 (5  $\mu$ M) in dichloromethane

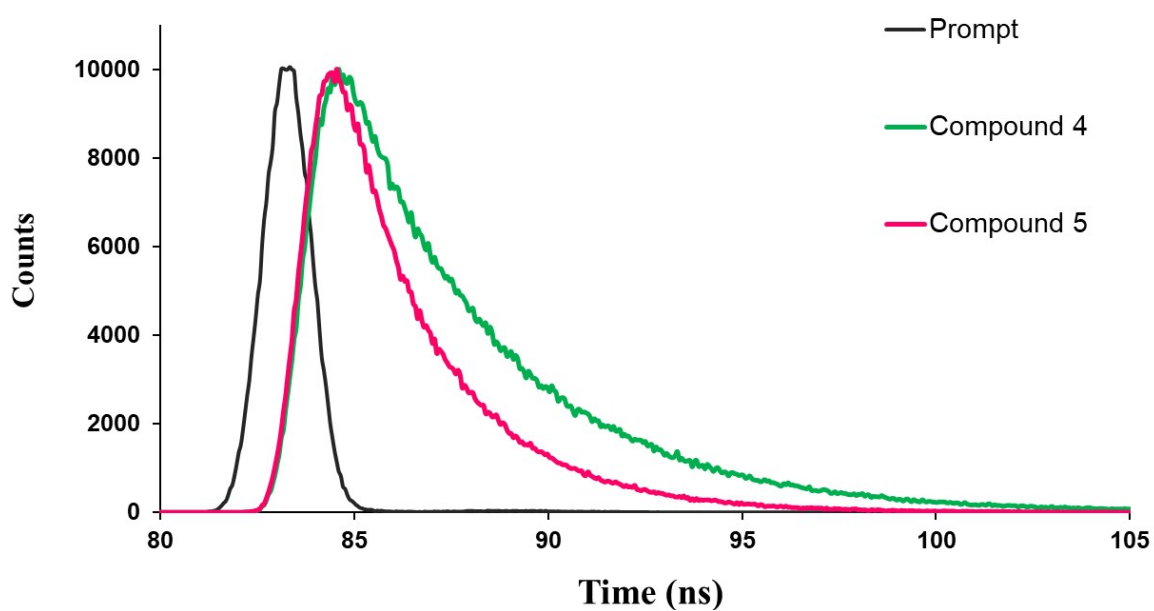

Fig. S12. Fluorescence decay profiles of compounds 4 and 5 in dichloromethane

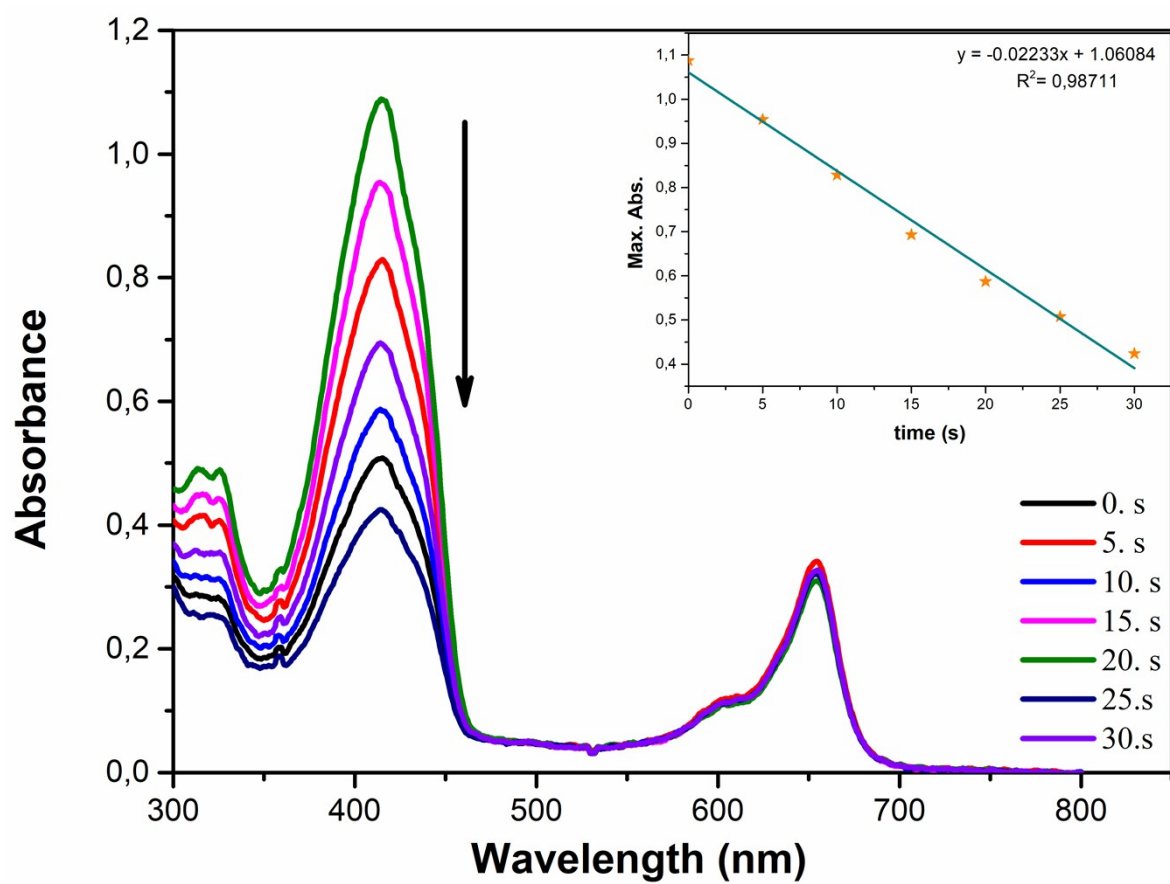

**Fig. S13.** Decrease in absorbance spectrum of DPBF in the presence of MB

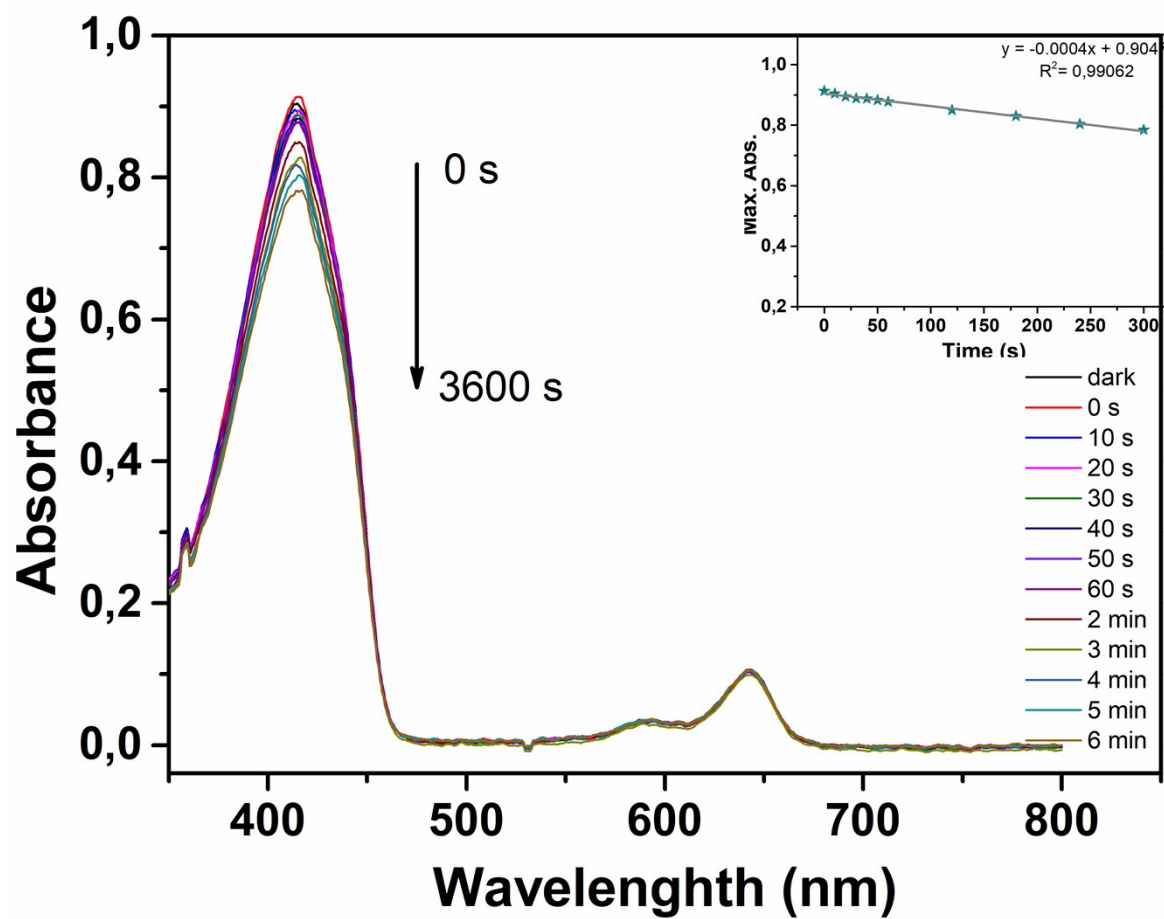

**Fig. S14.** Decrease in absorbance spectrum of DPBF in the presence of compound 4 (6.7  $\mu\text{M}$ )

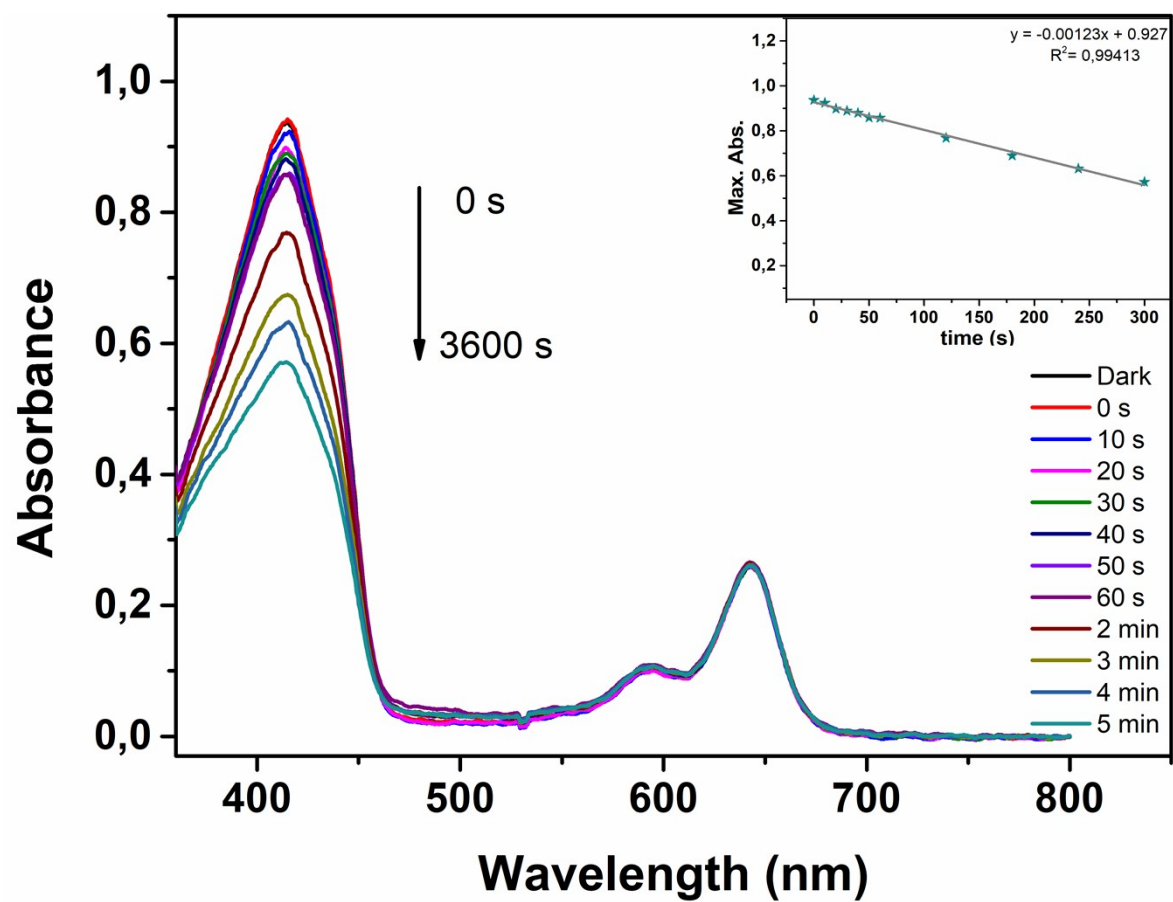

**Fig. S15.** Decrease in absorbance spectrum of DPBF in the presence of compound 5 (6.7  $\mu\text{M}$ ).
